# Supplementary material
Source: ML conference proceedings conference paper supplement (https://proceedings.neurips.cc/paper_files/paper/2019/hash/a6e4f250fb5c56aaf215a236c64e5b0a-Abstract.html)
Supplement: Supplementary file [file a6e4f250fb5c56aaf215a236c64e5b0a-Supplemental.zip]

## A Example images rendered using our method

This section contains additional example images rendered using GQN and our method.

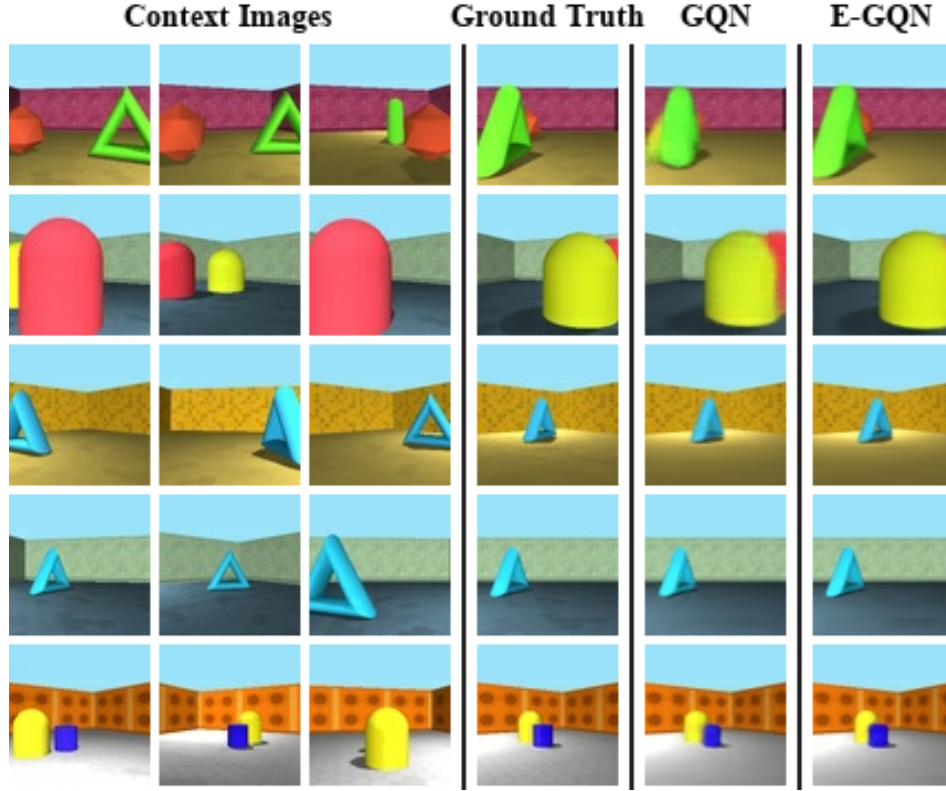

Figure 7: Rooms Ring Camera

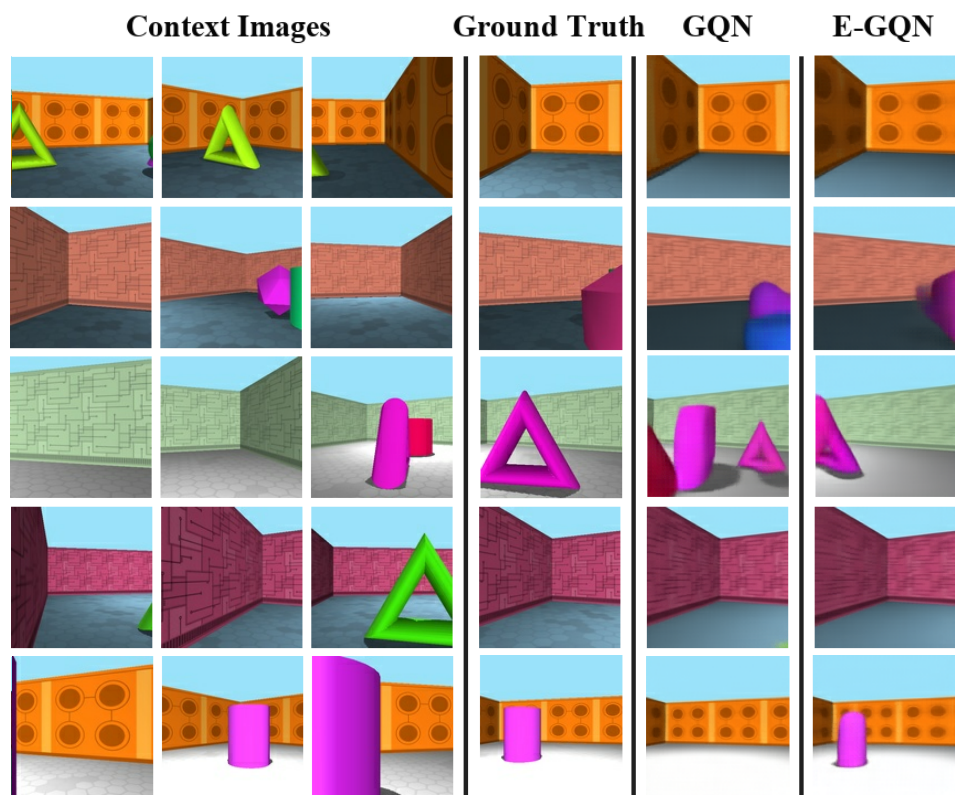

Figure 8: Rooms Free Camera

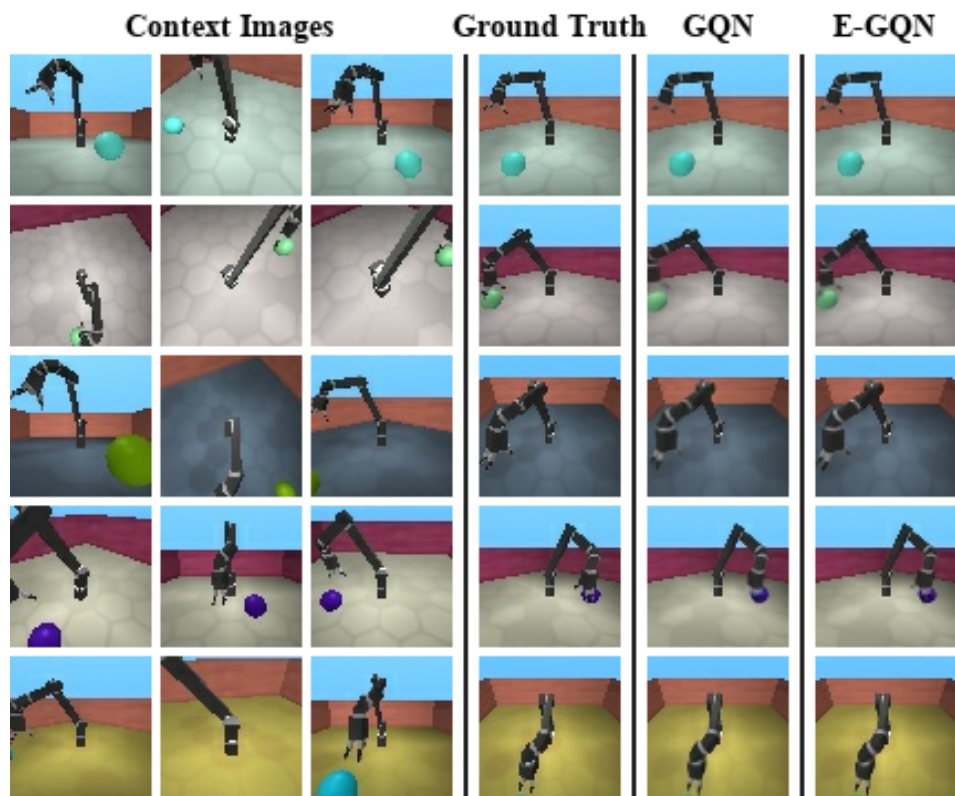

Figure 9: Jaco

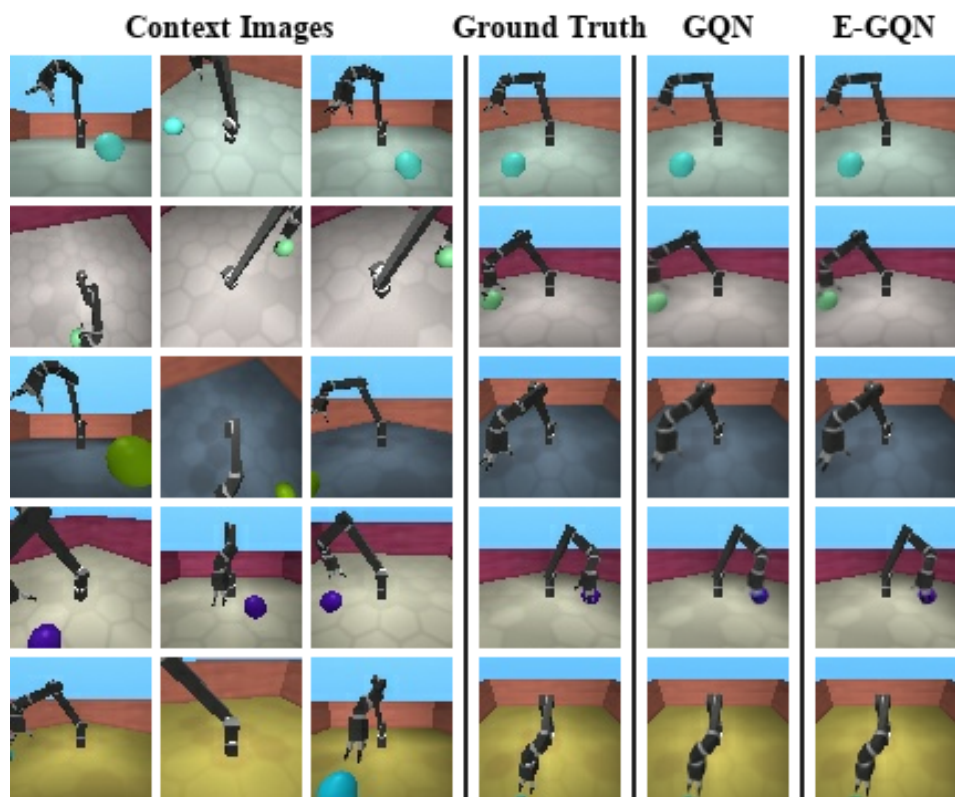

Figure 10: Shepard-Metzler 7 Parts

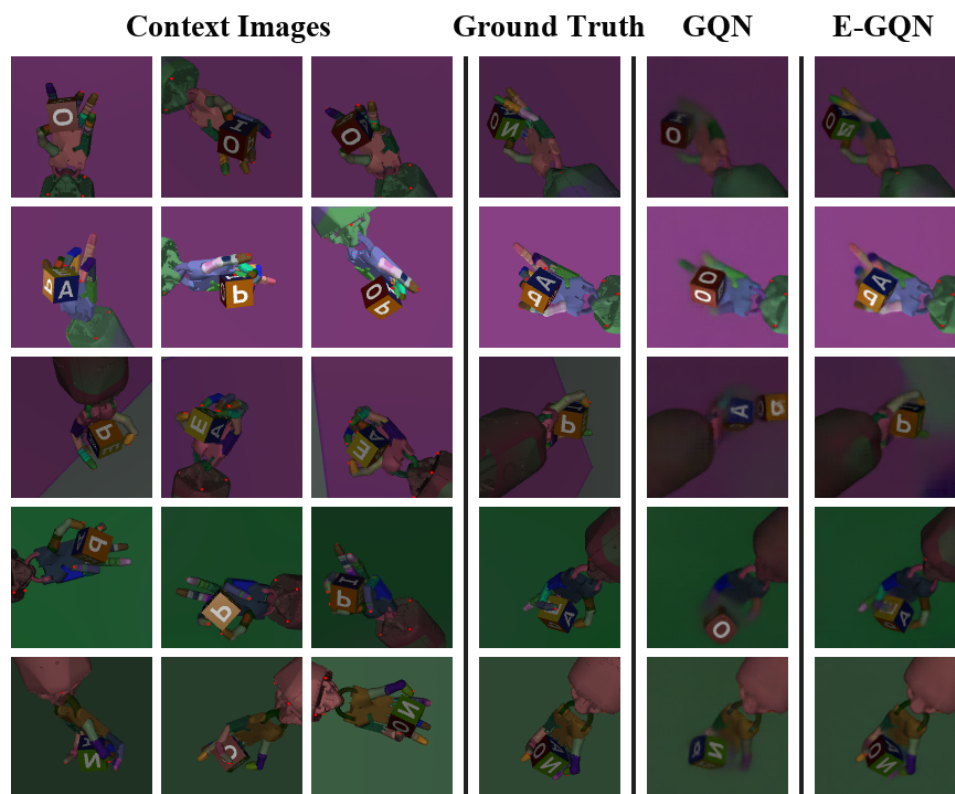

Figure 11: OpenAI Box.

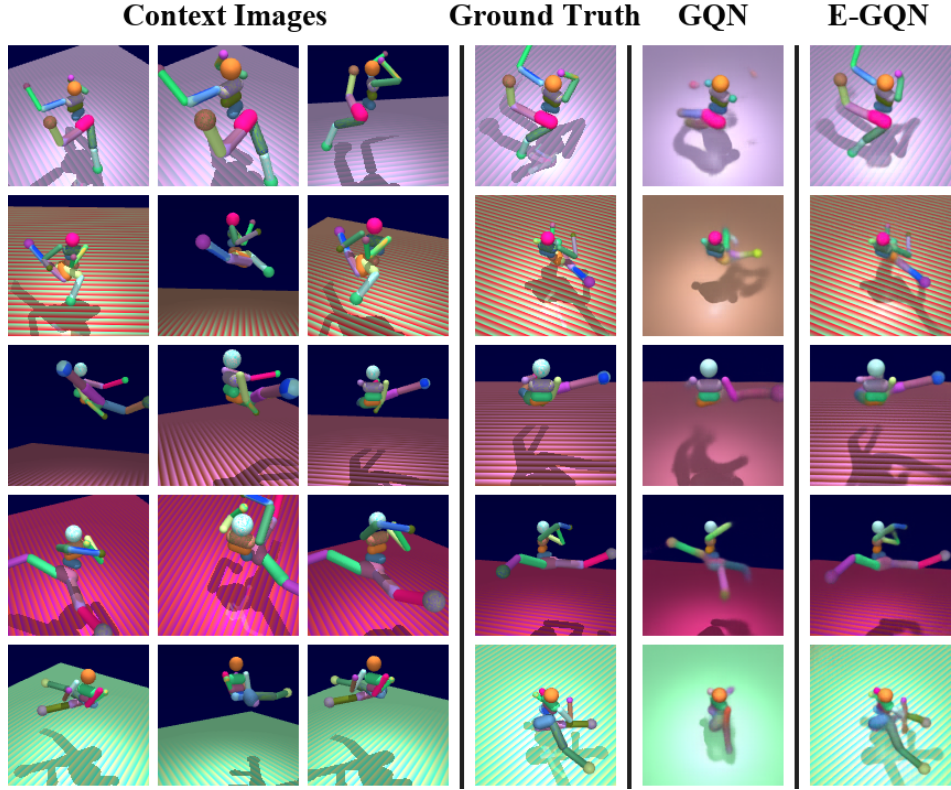

Figure 12: Disco Humanoid

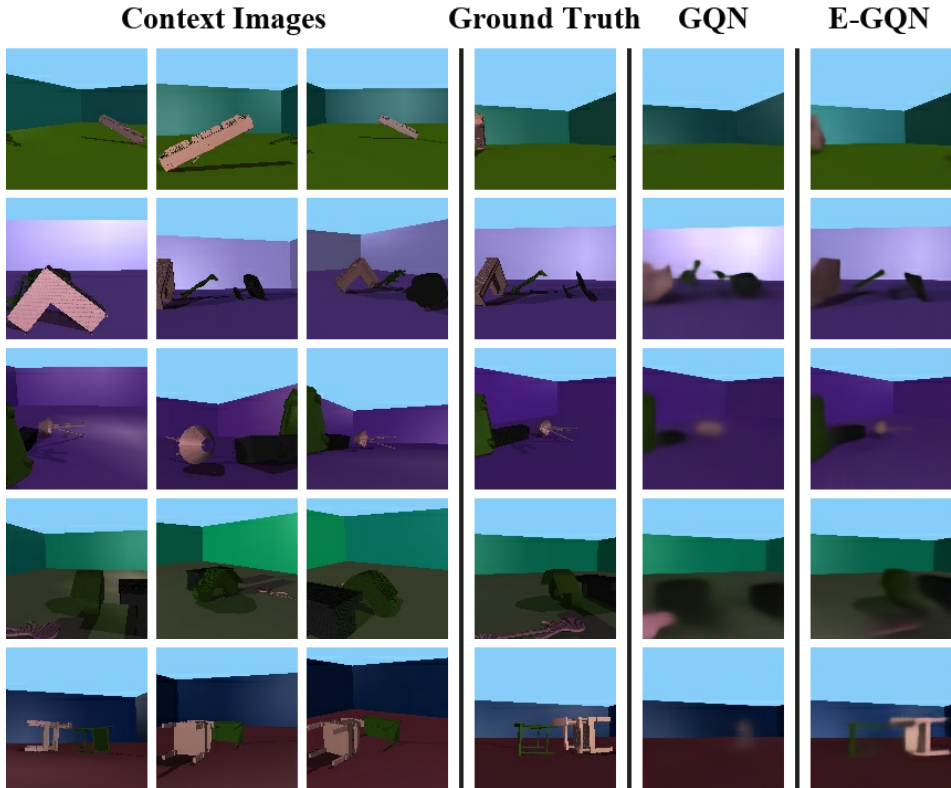

Figure 13: Rooms Random Objects
